# Supplementary material
Source: MDPI journal article supplement (https://www.mdpi.com/2073-4395/12/12/2948)
Supplement: s1 [file s1]

Supplementary Table 1. Cis-elements in the promoter region (~2 kb) of *ZmGST26*

| Site Name   | Strand | Sequence  | Function                                                             |
|-------------|--------|-----------|----------------------------------------------------------------------|
| DRE         | -      | GCCGAC    | Dehydration-responsive element                                       |
| DRE         | +      | ACCGAGA   | Dehydration-responsive element                                       |
| ABRE        | +      | ACGTG     | The cis-regulatory element involved in the abscisic acid reaction    |
| ABRE        | -      | CCGTG     | The cis-regulatory element involved in the abscisic acid reaction    |
| W-Box       | +      | TTGACC    | Drought response element                                             |
| ARE         | -      | AAACCA    | Cis-regulatory elements necessary for anaerobic induction            |
| GC-motif    | +      | CCCCCG    | Enhancer-like elements associated with hypoxia-specific induction    |
| CCAAT-box   | +      | CAACGG    | MYB recognition site                                                 |
| MRE         | +      | AACCTAA   | MYB binding site involved in photoreaction                           |
| TCCC-motif  | +      | TCTCCCT   | Part of a light response element                                     |
| G-Box       | -      | CACGTT    | Light responsiveness                                                 |
| G-Box       | -      | CACGTG    | Light responsiveness                                                 |
| CGTCA-motif | +      | CGTCA     | Cis-regulatory elements involved in the reaction of methyl jasmonate |
| TGACG-motif | -      | TGACG     | Cis-regulatory elements involved in the reaction of methyl jasmonate |
| MSA-like    | -      | TCAAACGGT | The cis-regulatory element involved in cell cycle regulation         |

Supplementary Table 2. Primer information in this study

| Primer ID         | Forward PCR Primer (5' → 3' ) | Reverse PCR Primer (3' → 5' ) |
|-------------------|-------------------------------|-------------------------------|
| <i>Bar</i>        | CCATCGTCAACCACTACATCGAGACA    | CTTCAGCAGGTGGGTGTAGAGCGT      |
| <i>Fl-ZmGST26</i> | TCGTGGAGTACGTCGATGAG          | GTGCGTCTCCCTCAGCTTAT          |
| <i>DREB2A</i>     | TGACCTAAATGGCGACGATGT         | TCCAAGTAACTCAAGTCGTCG         |
| <i>RD29A</i>      | CTTGATGGTCAACGGAAGGT          | CAATCTCCGGTACTCCTCCA          |
| <i>RD29B</i>      | AGAAGGAATGGTGGGAAAG           | CAACTCACTTCCACCGGAAT          |
| <i>PP2CA</i>      | CAAAGTCTCCAAGGGCAGGTTCT       | CGTCTGCGGATTCGTGTCTAAAA       |
| <i>ZmActin1</i>   | ATGTTTCCTCCCATTTGCCGAT        | CCAGTTTCGTCACTCTCCCTTG        |
| <i>AtActin2</i>   | GGCTCCTCTTAACCCAAAGG          | CCCTCGTAGATTGGCACAGT          |
